# Supplementary material for: Ashtanga-Based Yoga Therapy Increases the Sensory Contribution to Postural Stability in Visually-Impaired Persons at Risk for Falls as Measured by the Wii Balance Board: A Pilot Randomized Controlled Trial
Source: PLoS One. 2015 Jun 24;10(6):e0129646. doi: 10.1371/journal.pone.0129646 (PMC4479589; doi:10.1371/journal.pone.0129646)
Supplement: S1 Dataset — (XLSX) [file pone.0129646.s004.xlsx]

## Sheet: MTV COP
S1 Primary Outcomes Dataset
Individual Data for Absolute Center of Pressure, Mean Total Velocity (mm/s) in 4 Conditions
	FirmEO		FirmEC		FoamEO		FoamEC
AYT Subject ID	Baseline	Post	Baseline	Post	Baseline	Post	Baseline	Post
1	17.6605	12.6313	15.3605	13.6377	25.4707	32.0367	19.282	30.4287
2	8.713	12.0173	14.012	14.6847	17.8775	19.0503	23.356	26.6257
3	14.765	14.275	13.093	16.592	29.149	44.3427	26.8187	53.3057
4	12.9515	11.6933	15.6575	11.3187	24.0647	28.3203	24.7787	27.389
5	12.4763	12.964	13.5957	13.3933	32.53	35.657	28.005	45.3203
6	12.942	12.3463	12.1003	10.8997	22.1813	23.824	19.492	22.974
7	7.947	7.37833	7.305	9.27067	20.2203	27.5353	20.1043	27.8197
8	9.12167	14.7293	12.7193	16.1567	11.8963	26.6453	23.18	35.993
9	10.6543	10.1093	10.0473	11.427	20.1813	23.848	21.0667	27.9377
	FirmEO		FirmEC		FoamEO		FoamEC
Waitlist Subject ID	Baseline	Post	Baseline	Post	Baseline	Post	Baseline	Post
10	9.28	11.524	9.99	10.8003	18.25	22.6457	17.05	28.0143
11	13.93	13.416	15.14	15.9593	23.17	15.82	34.17	27.8357
12	17.04	13.102	15.17	14.263	30.9	35.1597	33.78	47.914
13	23.68	24.4747	23.55	24.0103	34.37	33.7533	37.22	38.4967
14	11.27	14.7093	10.2	13.1683	19.66	21.4547	23.08	24.9427
15	8.63	10.2123	8.12	13.0757	12.11	23.715	25.91	23.1653
16	17.04	14.502	15.17	12.8407	33.78	30.743	30.9	31.9113
17	11.7	12.2903	10.58	11.8147	18.35	23.368	20.28	26.4283
